# Supplementary material for: RNAi-mediated silencing of the HD-Zip gene HD20 in Nicotiana attenuata affects benzyl acetone emission from corollas via ABA levels and the expression of metabolic genes
Source: PubMed Central journal article supplement (PMC3413612; doi:10.1186/1471-2229-12-60), 2012-05-01
Supplement: 1471-2229-12-60-S1.pdf [file 1471-2229-12-60-S1.pdf]

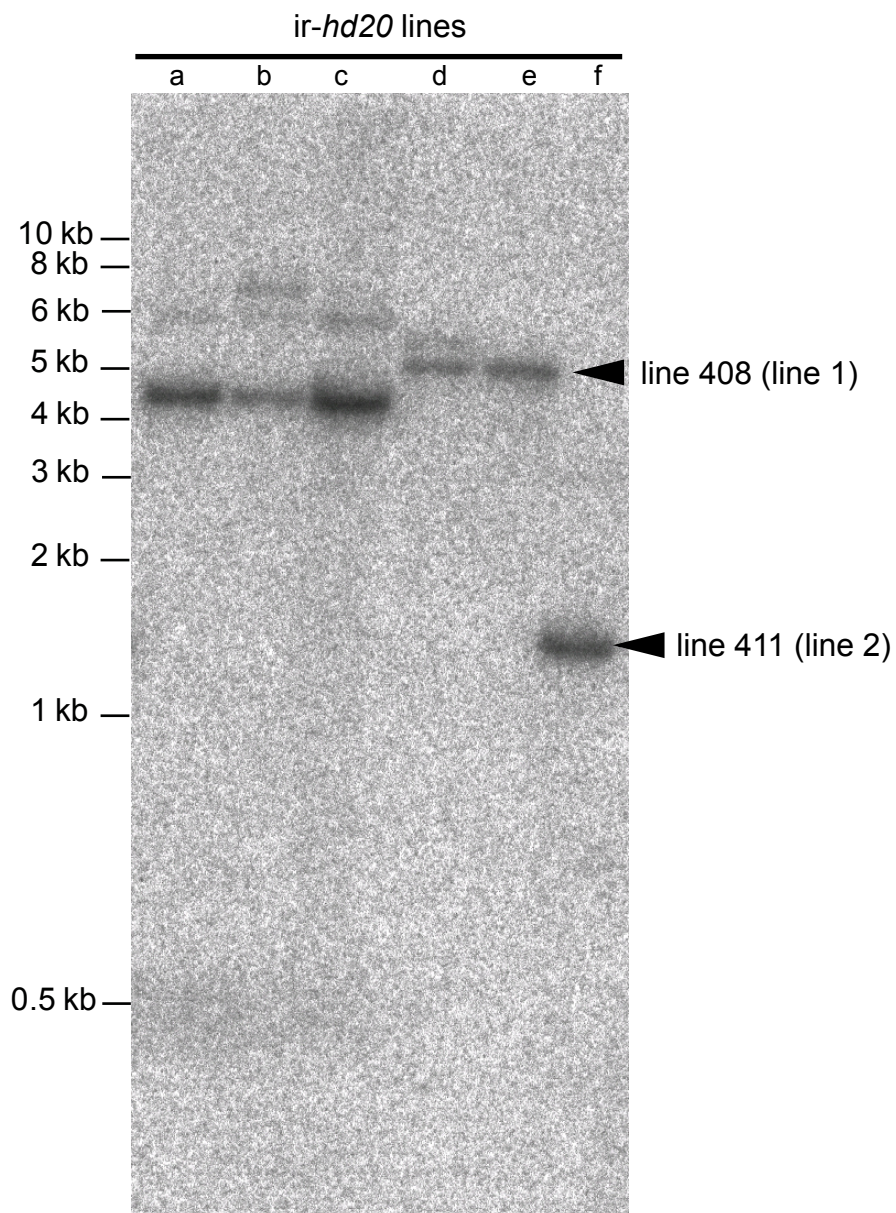

**Figure S1. Southern blot analysis of *ir-hd20* plants.**

Genomic DNA from six independent *ir-hd20* lines (a to f) and WT (not shown) was digested with *EcoRV* and resolved by agarose gel electrophoresis. A  $^{32}\text{P}$ -labeled PCR product corresponding to the hygromycin resistance gene (*nptII*) was used as a probe. The arrow heads point to individual T-DNA insertions in the lines 408 (*ir-hd20-1*) and 411 (*ir-hd20-2*) used in this study.
