# Supplementary material for: RNAi-mediated silencing of the HD-Zip gene HD20 in Nicotiana attenuata affects benzyl acetone emission from corollas via ABA levels and the expression of metabolic genes
Source: PubMed Central journal article supplement (PMC3413612; doi:10.1186/1471-2229-12-60), 2012-05-01
Supplement: 1471-2229-12-60-S2.pdf [file 1471-2229-12-60-S2.pdf]

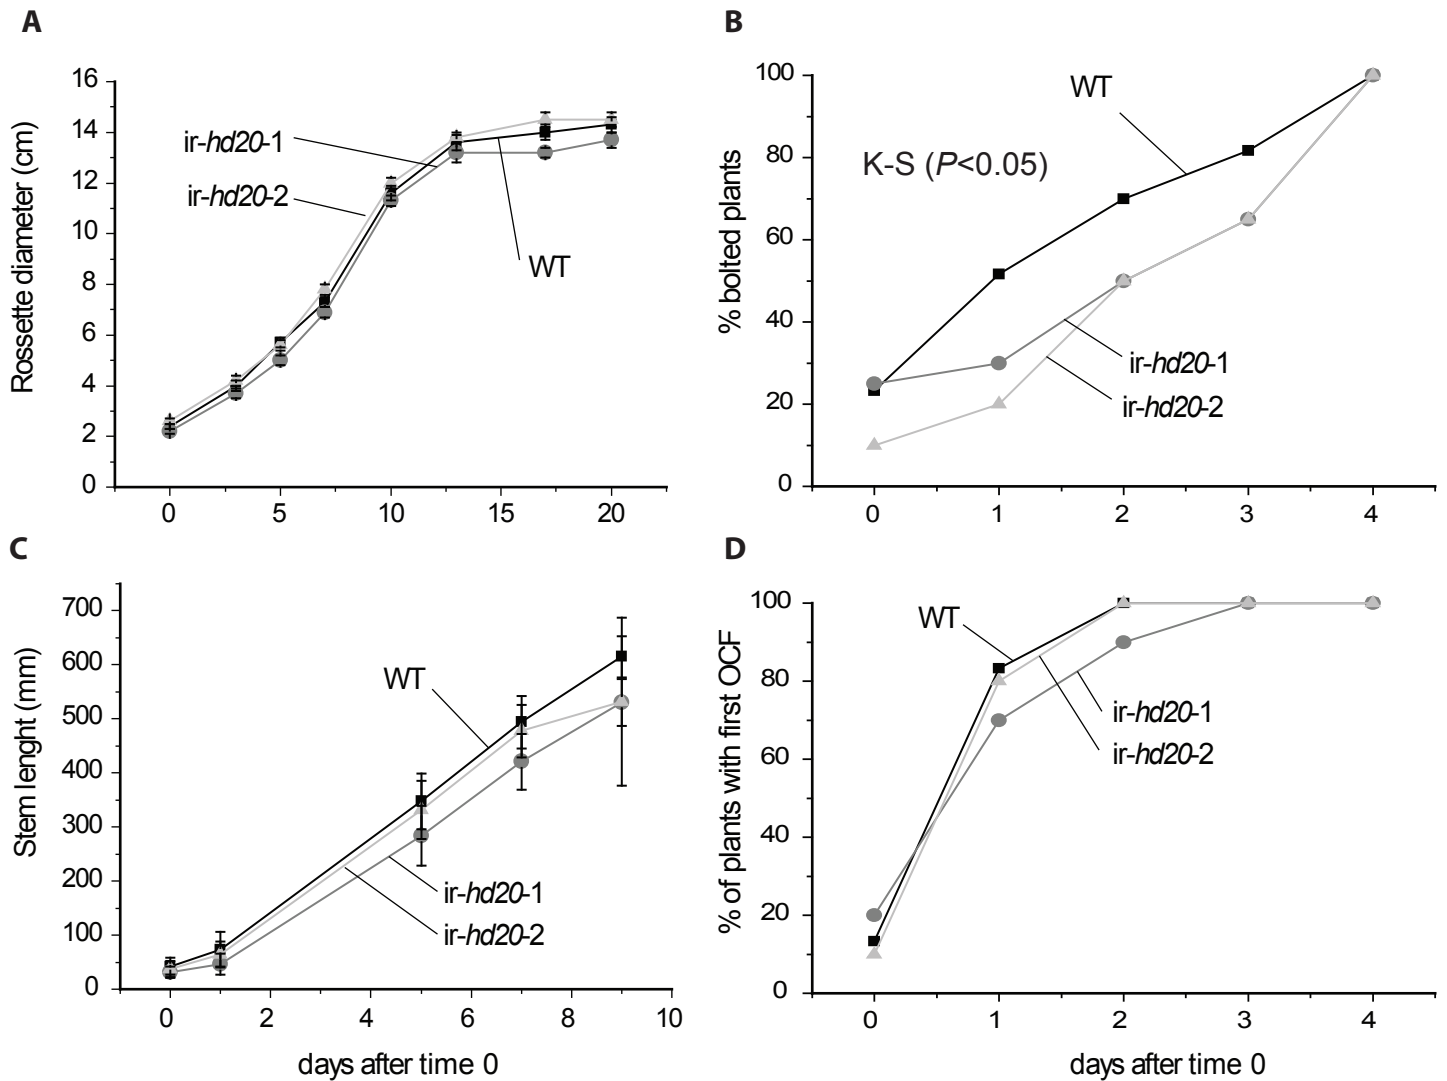

**Figure S2. Morphological and developmental characterization of *ir-hd20* plants**

WT and *ir-hd20 N. attenuata* plants were grown in the glasshouse under the conditions described in the Materials and Methods section. **(A)** Rosette diameter. The rosette diameter was defined as the distance between the tips of the two largest leaves ( $n=20$  plants per genotype). Day 0 (D0) was defined in this case as the first day of diameter measurements. **(B)** Percentage (%) of bolted plants. Bolted plants were defined as plants showing the emerging inflorescence meristem. Day 0 in this case refers to the day in which the first plant bolted (two-sample Kolmogorov-Smirnov (K-S) test;  $P < 10^{-4}$ ;  $n=20$  plant per genotype). **(C)** Rate of stalk elongation. Day 0 in this case refers to the first day of stalk length measurements ( $n=20$  plants per genotype). **(D)** Percentage (%) of plants that had at least one opened corolla flower (OCF). Day 0 in this case refers to the day in which the first plant showed an OCF ( $n=20$  plants per genotype).
