# Supplementary material for: RNAi-mediated silencing of the HD-Zip gene HD20 in Nicotiana attenuata affects benzyl acetone emission from corollas via ABA levels and the expression of metabolic genes
Source: PubMed Central journal article supplement (PMC3413612; doi:10.1186/1471-2229-12-60), 2012-05-01
Supplement: 1471-2229-12-60-S3.pdf [file 1471-2229-12-60-S3.pdf]

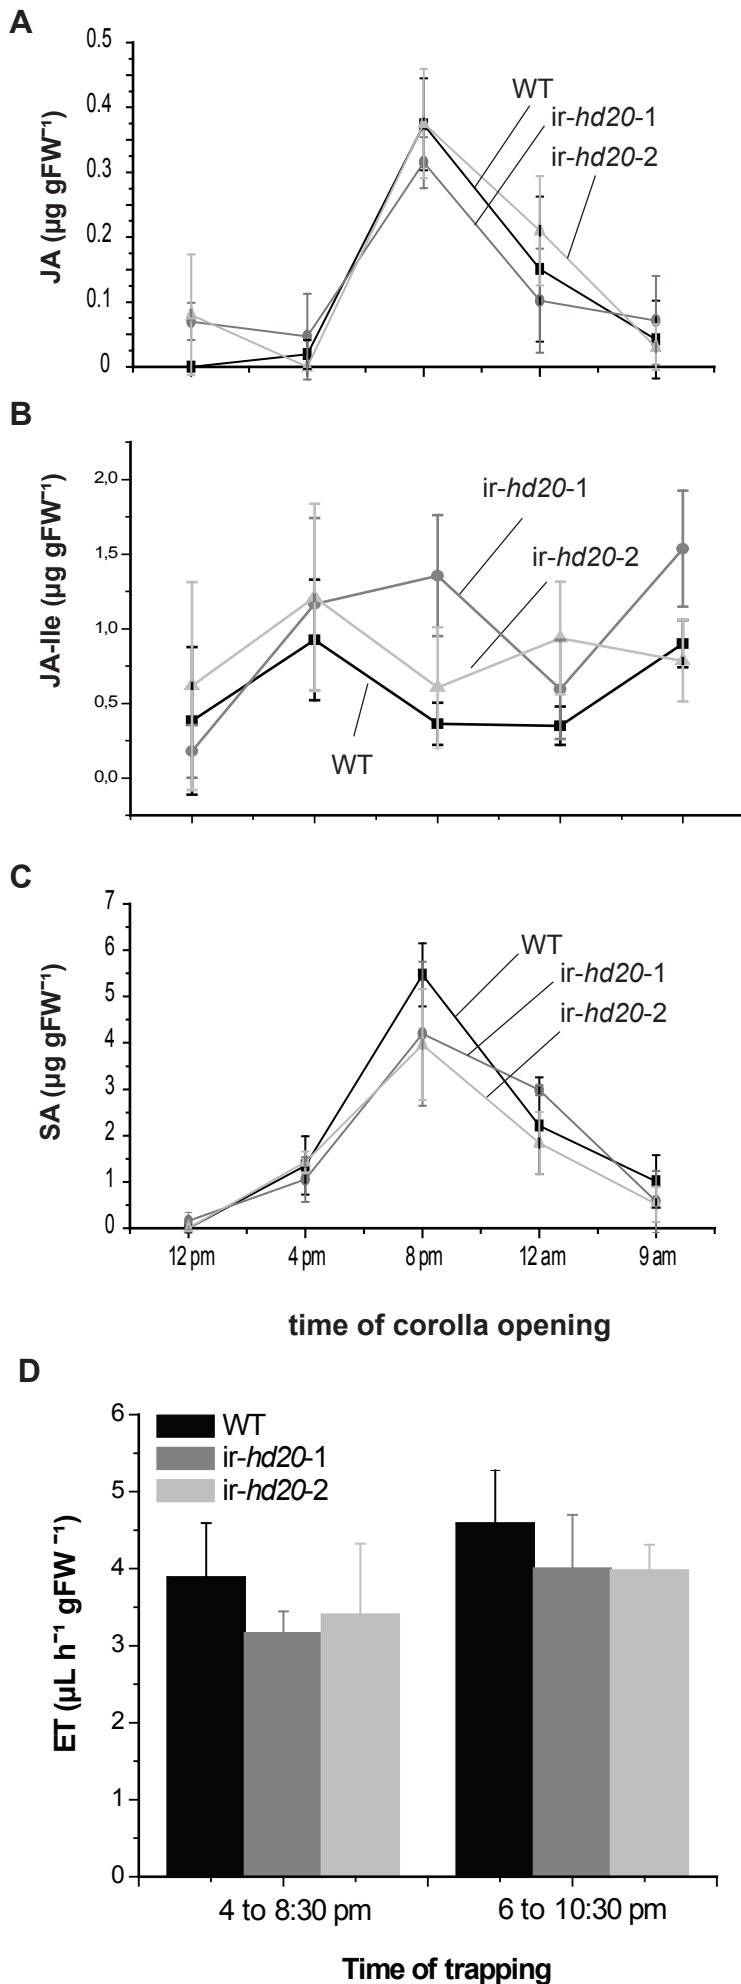

**Figure S3. Quantification of phytohormone levels in corollas of *ir-hd20* and WT plants during corolla opening.**

Phytohormones were extracted from isolated corollas at different times of corolla opening and analyzed by LC-MS/MS. **(A)** JA levels. **(B)** JA-Ile levels. **(C)** SA levels. (n=4; bars denote  $\pm$  SE). **(D)** Isolated corollas from emasculated *ir-hd20* and WT flowers were collected at 4 and 6 pm and placed in 100 mL glass containers for 4.5 h for quantification of ethylene levels as described in the Materials and Methods section (four corollas were pooled per sample and a total of four samples per genotype were used).
