# Supplementary material for: RNAi-mediated silencing of the HD-Zip gene HD20 in Nicotiana attenuata affects benzyl acetone emission from corollas via ABA levels and the expression of metabolic genes
Source: PubMed Central journal article supplement (PMC3413612; doi:10.1186/1471-2229-12-60), 2012-05-01
Supplement: 1471-2229-12-60-S4.pdf [file 1471-2229-12-60-S4.pdf]

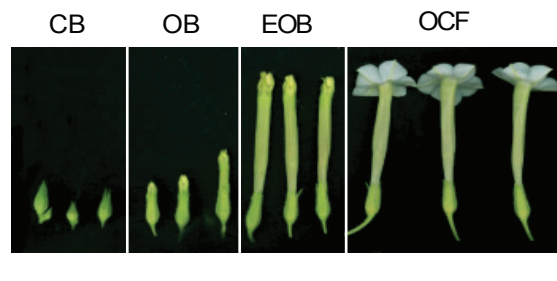

flower developmental stages

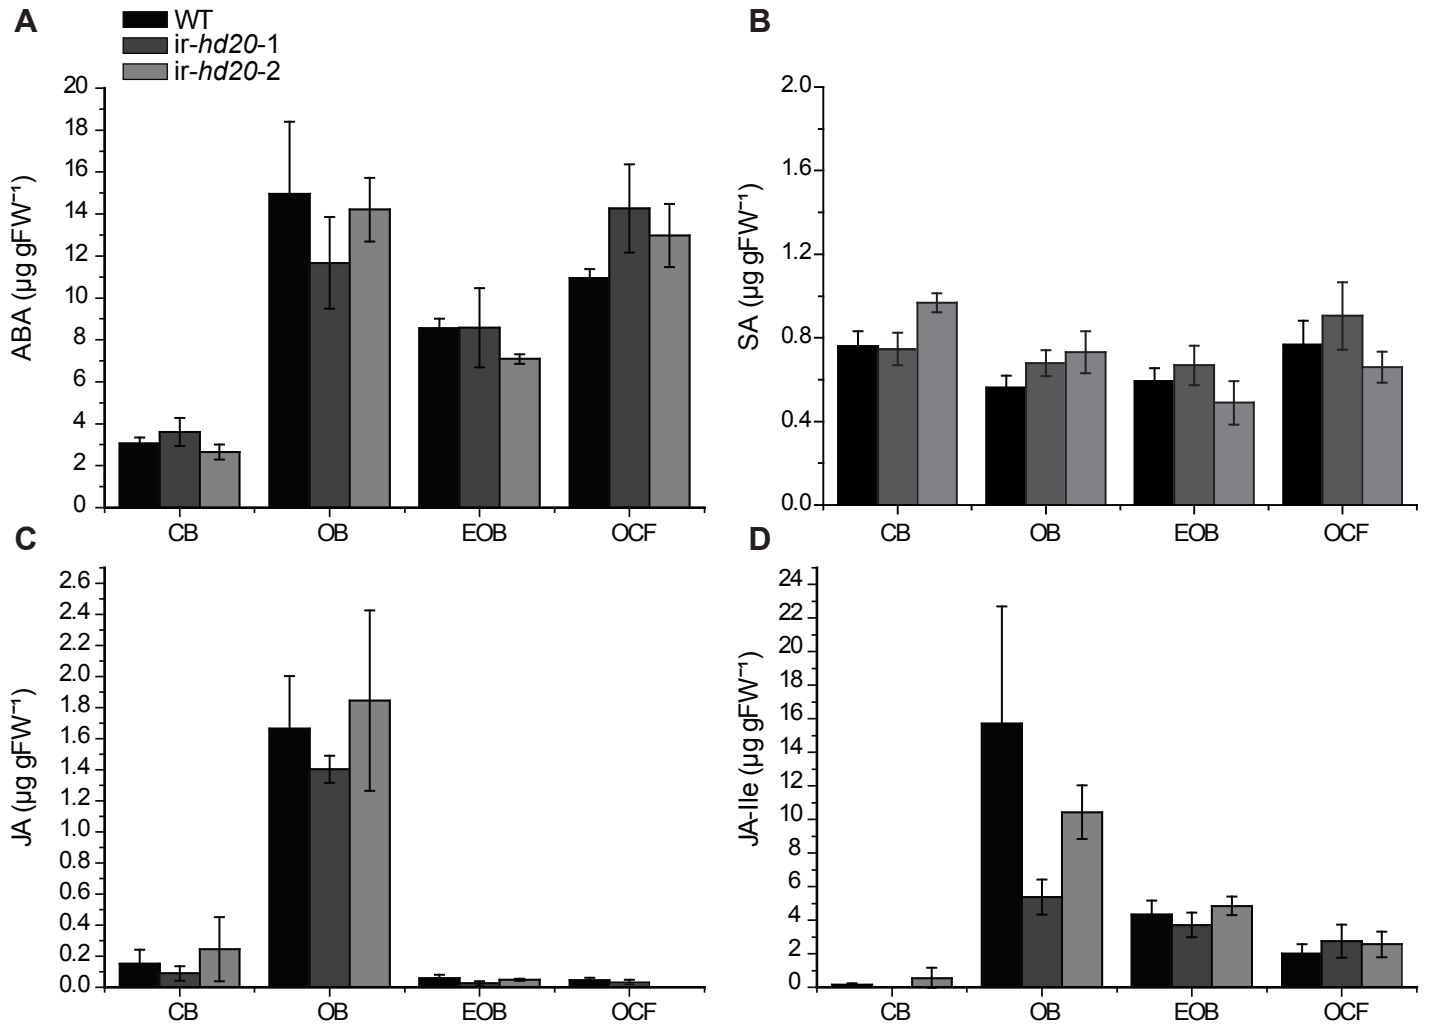

**Figure S4. Analysis of phytohormones in whole flowers of *ir-hd20* and WT plants at different developmental stages.**

Phytohormones were extracted from whole flowers at different developmental stages and quantified by LC-MS/MS as described in the Materials and Methods section ( $n=4$ ; bars denote  $\pm$  SE). **(A)** ABA levels. **(B)** SA levels. **(C)** JA levels. **(D)** JA-Ile levels. Closed buds (CB), opened buds (OB), elongating opened buds (EOB), opened corolla flowers (OCF).
