# Supplementary material for: RNAi-mediated silencing of the HD-Zip gene HD20 in Nicotiana attenuata affects benzyl acetone emission from corollas via ABA levels and the expression of metabolic genes
Source: PubMed Central journal article supplement (PMC3413612; doi:10.1186/1471-2229-12-60), 2012-05-01
Supplement: 1471-2229-12-60-S6.pdf [file 1471-2229-12-60-S6.pdf]

**Additional file 6****List of primers for qPCR analysis**

| <b>Primer name</b> | <b>Sequence 5'&gt;3'</b>  |
|--------------------|---------------------------|
| Na-HD20 Fw         | CCGAGAAAGAAGGTGGACAGTATTG |
| Na-HD20 Rv         | AGCCGAATAATCAGCCTTTATGC   |
| Na-Chal1 Fw        | TCATTTGGATAGTATGGTCGGG    |
| Na-Chal1 Rv        | ACCGTTGATAGCGCCATCGC      |
| Na-CK Fw           | TTCTCTGTTACCTGCTTCAACC    |
| Na-CK Rv           | CTACACAGAGATCCGAAGGAG     |
| Na-SAMT/BAMT Fw    | AAGCAATGGCCAAAAGCAGTCGC   |
| Na-SAMT/BAMT Rv    | TTCGTAGAACGCCGGCAACGAC    |
| Na-DFR Fw          | GGCAGCGCCAACGGTTTGC       |
| Na-DFR Rv          | TCAAGTCCGCTTTCCACAGCGTC   |
| Na-PP2C Fw         | TCCCGTCGGCCACTTACCTCC     |
| Na-PP2C Rv         | CATGGTTGCTCGCCATCCTTGC    |
